# Supplementary material
Source: PubMed Central journal article supplement (PMC3020902)
Supplement: NIHMS259829-supplement-1.pdf [file NIHMS259829-supplement-1.pdf]

**Supplementary Table 1. Power to detect association between genetic variants and CAAD.**

| <b>Homozygote (Heterozygote)</b> | <b>Risk Allele</b> | <b>Linkage</b>                        | <b>Power (p&lt;0.05)</b> |
|----------------------------------|--------------------|---------------------------------------|--------------------------|
| <b>Relative Risk</b>             | <b>Frequency</b>   | <b>Disequilibrium (r<sup>2</sup>)</b> |                          |
| 2.0 (1.5)                        | 0.05               | 1                                     | 0.72                     |
| 2.0 (1.5)                        | 0.1                | 1                                     | 0.91                     |
| 2.0 (1.5)                        | 0.2                | 1                                     | 0.99                     |
| 2.0 (1.5)                        | 0.3                | 1                                     | 0.99                     |
| 2.0 (1.5)                        | 0.05               | 0.8                                   | 0.63                     |
| 2.0 (1.5)                        | 0.1                | 0.8                                   | 0.85                     |
| 2.0 (1.5)                        | 0.2                | 0.8                                   | 0.96                     |
| 2.0 (1.5)                        | 0.3                | 0.8                                   | 0.98                     |
| 2.0 (1.5)                        | 0.05               | 0.64                                  | 0.55                     |
| 2.0 (1.5)                        | 0.1                | 0.64                                  | 0.74                     |
| 2.0 (1.5)                        | 0.2                | 0.64                                  | 0.92                     |
| 2.0 (1.5)                        | 0.3                | 0.64                                  | 0.94                     |

Power estimates are based on 1000 simulations per parameter set for a sample size of 530 CAAD cases and 770 controls, assuming a population prevalence of 0.04. Association tests were performed using logistic regression as described in Methods.

**Supplementary Table 2. Minor allele frequencies in the sub-sample typed for KIV2 repeat and the complete sample.**

| SNP              | Complete sample<br>minor allele freq | Sub-sample minor<br>allele freq | Fisher's exact<br>p-value |
|------------------|--------------------------------------|---------------------------------|---------------------------|
| rs3123629        | 0.30                                 | 0.30                            | 1.00                      |
| rs7754014        | 0.23                                 | 0.27                            | 0.20                      |
| rs7449650        | 0.33                                 | 0.34                            | 0.68                      |
| rs6919346        | 0.15                                 | 0.18                            | 0.29                      |
| rs3798220        | 0.02                                 | 0.01                            | 0.37                      |
| rs11751605       | 0.16                                 | 0.13                            | 0.40                      |
| rs4708871        | 0.03                                 | 0.02                            | 0.48                      |
| rs7761293        | 0.47                                 | 0.42                            | 0.25                      |
| rs6415084        | 0.47                                 | 0.48                            | 0.94                      |
| rs3798221        | 0.20                                 | 0.18                            | 0.63                      |
| rs10455872       | 0.08                                 | 0.07                            | 1.00                      |
| rs1367209        | 0.28                                 | 0.29                            | 0.73                      |
| rs1321195        | 0.15                                 | 0.11                            | 0.23                      |
| rs783149         | 0.17                                 | 0.13                            | 0.26                      |
| rs1358753        | 0.13                                 | 0.18                            | 0.12                      |
| <b>rs9458005</b> | <b>0.22</b>                          | <b>0.31</b>                     | <b>0.01</b>               |
| <b>rs1950562</b> | <b>0.42</b>                          | <b>0.51</b>                     | <b>0.03</b>               |
| rs9458011        | 0.06                                 | 0.07                            | 0.62                      |
| rs1853017        | 0.30                                 | 0.27                            | 0.50                      |
| rs2295368        | 0.40                                 | 0.41                            | 0.94                      |
| rs9456577        | 0.03                                 | 0.01                            | 0.32                      |
| rs4252129        | 0.01                                 | 0.02                            | 0.35                      |
| <b>rs813641</b>  | <b>0.16</b>                          | <b>0.24</b>                     | <b>0.0046</b>             |
| rs1317026        | 0.02                                 | 0.02                            | 1.00                      |
| <b>rs2859879</b> | <b>0.34</b>                          | <b>0.48</b>                     | <b>0.00018</b>            |
| <b>rs4252170</b> | <b>0.07</b>                          | <b>0.13</b>                     | <b>0.0090</b>             |
| rs783182         | 0.49                                 | 0.53                            | 0.32                      |
| <b>rs783176</b>  | <b>0.17</b>                          | <b>0.25</b>                     | <b>0.011</b>              |

Bold indicates 6 SNPs which show significantly different minor allele frequencies in the sub-sample of 90 individuals typed for the KIV2 repeat compared with the complete sample at  $p < 0.05$  (FDR = 0.14).
